# Supplementary material
Source: Springer Nature journal article supplement (https://www.springermedizin.de/resource/supplementary/12913_2013_3105_MOESM1_ESM.pdf/9532444)
Supplement: MOESM1 [file 9532444]

|                                                                                                    |             | The FB (1.0) item variable |        |          |       |       |       |
|----------------------------------------------------------------------------------------------------|-------------|----------------------------|--------|----------|-------|-------|-------|
|                                                                                                    |             | Ordinary housework         |        |          |       |       |       |
|                                                                                                    |             | No                         | Slight | Moderate | Major | Total | Total |
|                                                                                                    |             | problems                   |        |          |       |       | BIS   |
| The BIS item variable:<br>To what extent have indoor activities been limited because of your pain? | Very much   |                            |        | 5        | 10    | 6     | 21    |
|                                                                                                    | Quite a bit |                            | 7      | 14       | 13    |       | 34    |
|                                                                                                    | Moderate    | 1                          | 10     | 14       | 2     |       | 27    |
|                                                                                                    | Negligible  |                            | 1      | 2        |       |       | 3     |
|                                                                                                    | Not at all  | 1                          | 1      |          |       |       | 2     |
|                                                                                                    | Total FB    | 2                          | 19     | 35       | 25    | 6     | 87    |
